# Supplementary material
Source: Springer Nature journal article supplement (https://www.springermedizin.de/resource/supplementary/12889_2009_2227_MOESM1_ESM.pdf/9485064)

Kernel Density of Propensity Scores (pre-Matching)

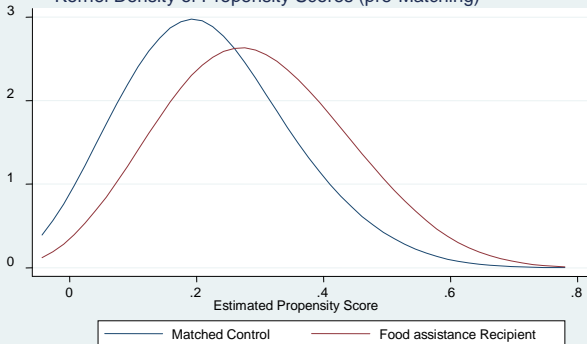

Kernel Density of Propensity Scores (post-Matching)

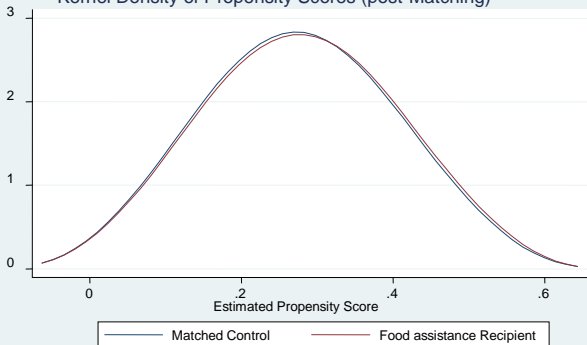

Supplement: MOESM1 [file 9485064]
